# Supplementary material
Source: PubMed Central journal article supplement (PMC3461965)
Supplement: NIHMS349072-supplement-01.pdf [file NIHMS349072-supplement-01.pdf]

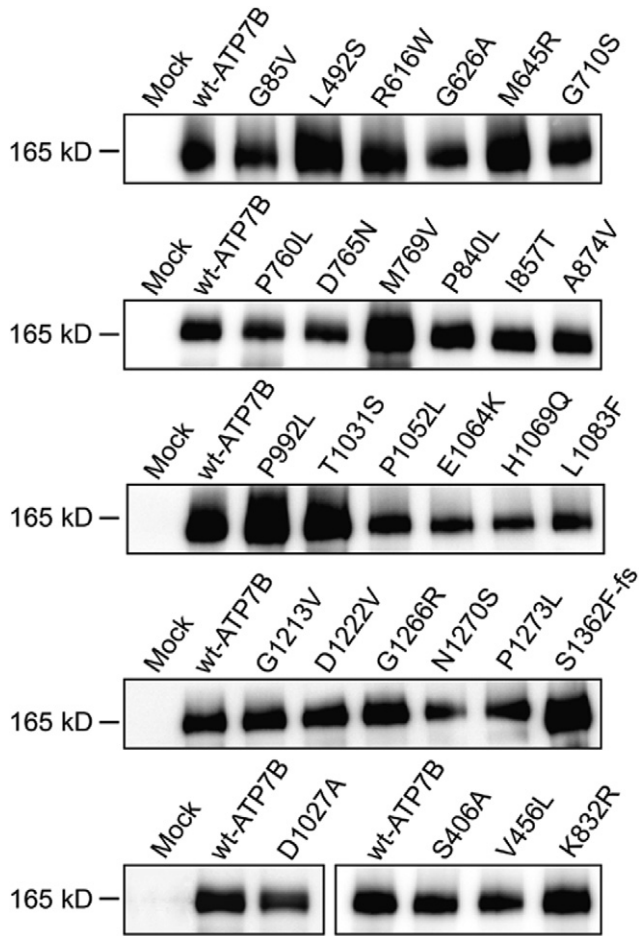

**Supplementary Figure 1.** Protein expression levels of Sf9 cell vesicles detected by Western blot analysis using polyclonal antibody a-ABD of wt-ATP7B and various mutants. All mutants were expressed and detected in vesicles.

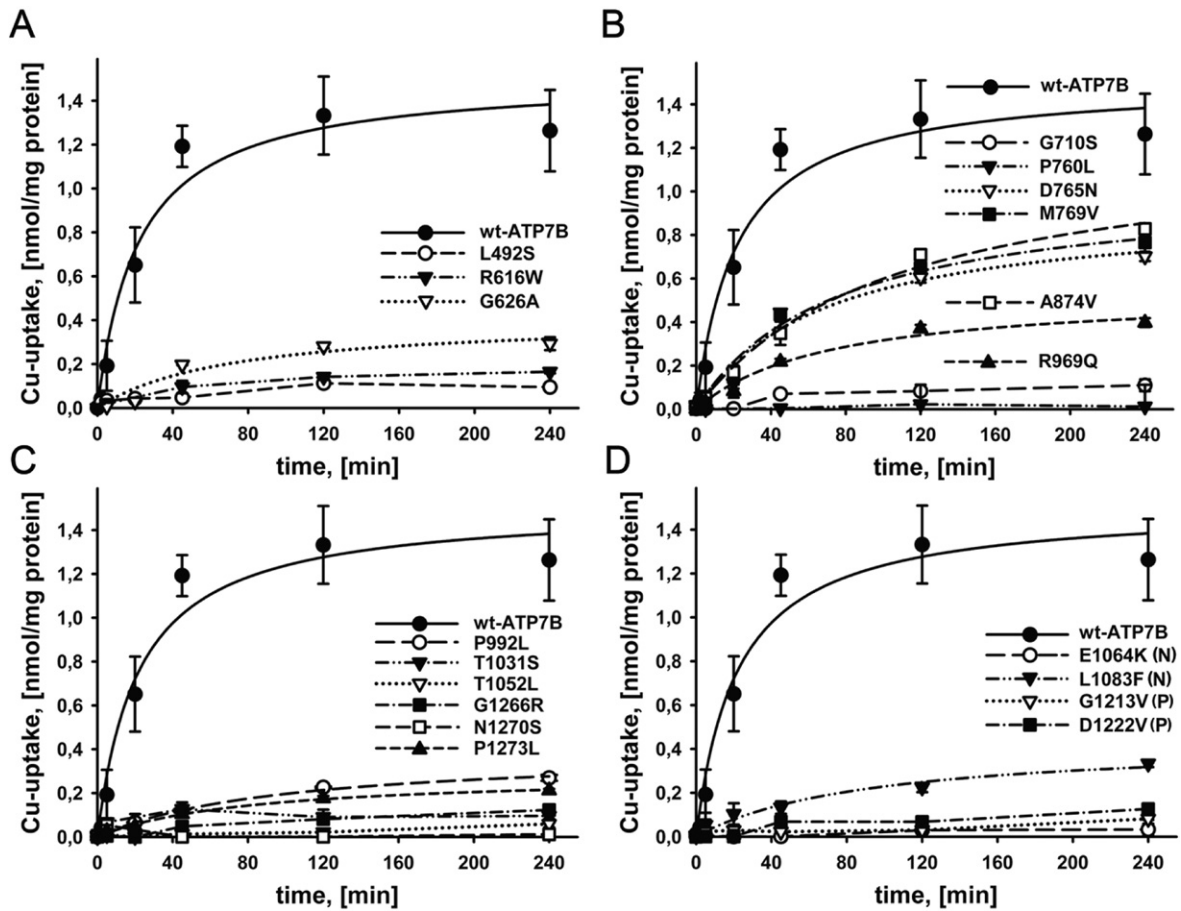

**Supplementary Figure 2.** The effects of *ATP7B* mutations on Cu transport. (A) N-terminal Cu binding unit domain mutants: L492S; R616W; G626A. (B) Transmembrane domain and A-domain mutants: G710S; P760L; D765N; M769V; A874V; R969Q. (C) ATP-binding-domain: P992L; T1031S; P1052L; G1266R; N1270S; P1273L. (D) ATP-binding-domain: E1064K; L1083F; G1213V, D1222V. N, nucleotide binding domain; P, phosphorylation domain.

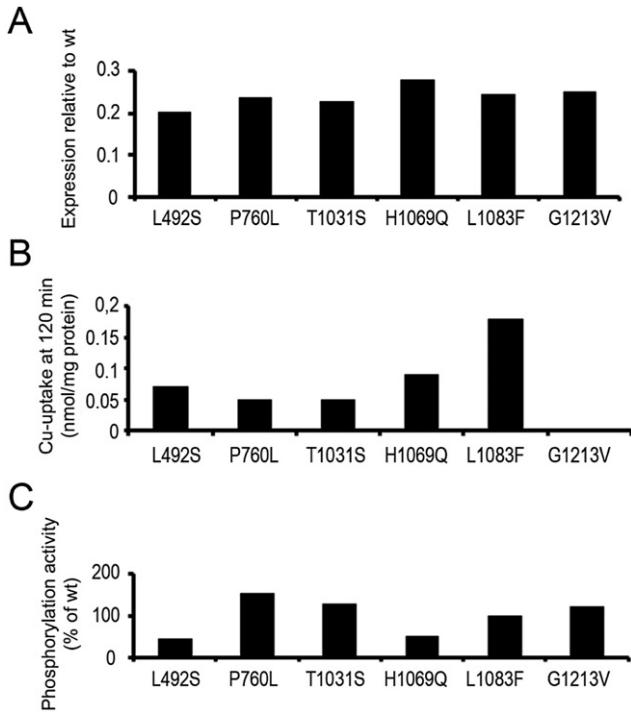

**Supplementary Figure 3.** (A) Several ATP7B mutants were expressed in parallel under identical conditions, and protein amounts were quantified by densitometry. Their (B) copper uptake and (C) catalytic activity were then normalized to the protein expression levels. A significant variation of copper uptake and catalytic activity irrespective of expression level was observed.

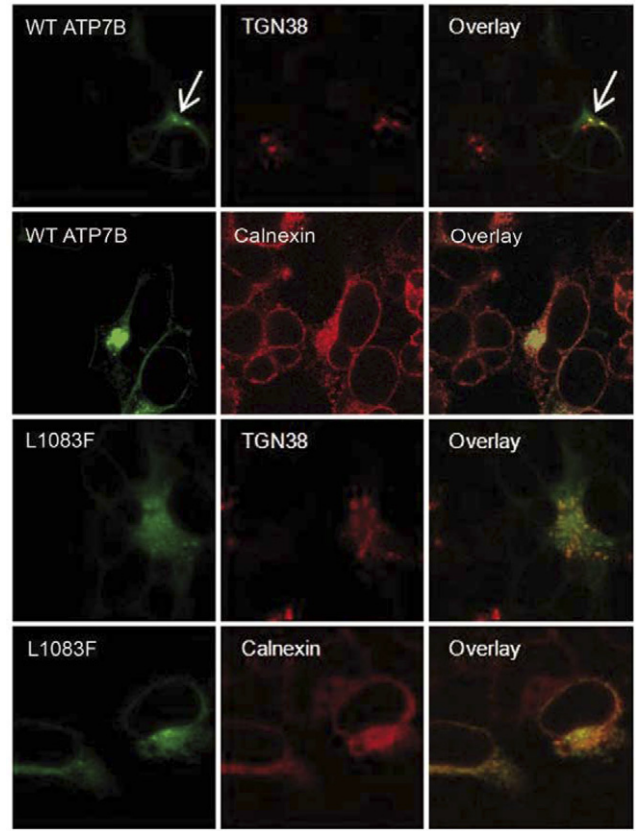

**Supplementary Figure 4.** The localization of the L1083F mutant at 28°C compared to the wt-ATP7B. The wt-ATP7B (*green*) shows predominantly TGN localization as evidenced by co-staining with the TGN marker TGN38 (*red*). In contrast, the L1083F mutant (*green*) localizes in both the ER compartment and TGN as evidenced by partial overlay with both the ER marker Calnexin (*red*) and the TGN marker, TGN38 (*red*).

**Supplementary Table 1.** Mutagenesis Primers Used for Site-Directed Mutagenesis

| Amino acid change                                                             | Protein location                                                                           | Forward primer (5'-3')                                                                                                                                                                                                                                                                                                                                                                                                                      | Reverse primer (5'-3')                                                                                                                                                                                                                                                                                                                                                                                                                      |
|-------------------------------------------------------------------------------|--------------------------------------------------------------------------------------------|---------------------------------------------------------------------------------------------------------------------------------------------------------------------------------------------------------------------------------------------------------------------------------------------------------------------------------------------------------------------------------------------------------------------------------------------|---------------------------------------------------------------------------------------------------------------------------------------------------------------------------------------------------------------------------------------------------------------------------------------------------------------------------------------------------------------------------------------------------------------------------------------------|
| D1027A<br>G85V                                                                | P-domain<br>NTD                                                                            | GAC TGT GAT GTT TGC CAA GAC TGG CAC C<br>CAG GAT TTC CAA TTT GAA AGT CAT CAT CAG CAT GAA<br>GGT TTC                                                                                                                                                                                                                                                                                                                                         | GGT GCC AGT CTT GGC AAA CAT CAC AGT C<br>GAA ACC TTC ATG CTG ATG ATG ACT TTC AAA TTG GAA<br>ATC CTG                                                                                                                                                                                                                                                                                                                                         |
| L492S<br>R616W<br>G626A                                                       | NTD<br>NTD<br>NTD                                                                          | CCG CAG AAG TGC TTC TCA CAG ATC AAA GGC ATG A<br>GAC CCG GAA ATT ATC GGT CCA TGG GAT ATT ATC<br>TCA AAA TTA TTG AGG AAA TTG CCT TTC ATG CTT CCC<br>TGG C                                                                                                                                                                                                                                                                                    | TCA TGC CTT TGA TCT GTG AGA AGC ACT TCT GCG G<br>GAT AAT ATC CCA TGG ACC GAT AAT TTC CGG GTC<br>GCC AGG GAA GCA TGA AAG GCA ATT TCC TCA ATA<br>ATT TTG A                                                                                                                                                                                                                                                                                    |
| M645R<br>G710S<br>P760L<br>D765N<br>M769V<br>P840L<br>I857T<br>A874V<br>A874V | NTD<br>Loop -3<br>TMD 4<br>TMD 4<br>TMD 4<br>A-domain<br>A-domain<br>A-domain<br>(HEK 293) | CAC TTG GAC CAC AAG AGG GAA ATA AAG CAG TGG A<br>GTC CAG CTC CTC AGT GGG TGG TAC TTC TAC G<br>GGC GGA GAG GAG CCT TGT GAC ATT CTT CG<br>GCC CTG TGA CAT TCT TCA ACA CGC CCC CCA TGC<br>CGA CAC GCC CCC CGT GCT CTT TGT GTT C<br>CTG GGG GAA AGT TTC TAG TGG ATG GGA AAG TCC T<br>CTG ATG AGT CCC TCA CCA CAG GAG AAG CCA<br>CGG AAG CAC TGT AAT TGT GGG GTC TAT AAA TGC ACA<br>ACC CGG AAG CAC TGT AAT TGT GAG GTC TAT AAA TGC<br>ACA TGG C | TCC ACT GCT TTA TTT CCC TCT TGT GGT CCA AGT G<br>CGT AGA AGT ACC ACC CAC TGA GGA GCT GGA C<br>CGA AGA ATG TCA CAA GGC TCC TCT CCG CC<br>GCA TGG GGG GCG TGT TGA AGA ATG TCA CAG GGC<br>GAA CAC AAA GAG CAC GGG GGG CGT GTC G<br>AGG ACT TTC CCA TCC ACT AGA AAC TTT CCC CCA G<br>TGG CTT CTC CTG TGG TGA GGG ACT CAT CAG<br>TGT GCA TTT ATA GAC CCC ACA ATT ACA GTG CTT CCG<br>GCC ATG TGC ATT TAT AGA CCC TCA AAT TAC AGT GCT<br>TCC GGG T |
| R969Q<br>R969Q                                                                | Loop 5-6<br>(HEK 293)                                                                      | CAG AGG TGA TCA TCC AGT TTG CTT TCC AGA CGT CC<br>CCC AGA CAG AGG TGA TCA TCC AGT TTG CTT TCC AGA<br>CGT CCA T                                                                                                                                                                                                                                                                                                                              | GGA CGT CTG GAA AGC AAA ATG GAT GAT CAC CTC TG<br>ATG GAC GTC TGG AAA GCA AAC TGG ATG ATC ACC<br>TCT GTC TGG G                                                                                                                                                                                                                                                                                                                              |
| P992L<br>T1031S<br>P1052L<br>E1064K<br>H1069Q<br>L1083F                       | P-domain<br>P-domain<br>P-domain<br>N-domain<br>N-domain<br>N-domain                       | GGG GCT GGC CAC GCT CAC GGC TGT CAT GG<br>GTT TGA CAA GAC TGG CTC CAT TAC CCA TGG CG<br>GTG GCC ACA CTG CTC CTC AGG AAG GTT C<br>GTG GGG ACT GCG AAG GCC AGC AGT GA<br>GGC CAG CAG TGA ACA ACC CTT GGG CGT G<br>CCA AAT ACT GTA AAG AGG AAT TTG GAA CAG AGA CCT<br>TGG G                                                                                                                                                                    | CCA TGA CAG CCG TGA GCG TGG CCA GCC CC<br>CGC CAT GGG TAA TGG AGC CAG TCT TGT CAA AC<br>GAA CCT TCC TGA GGA GCA GTG TGG CCA C<br>TCA CTG CTG GCC TTC GCA GTC CCC AC<br>CAC GCC CAA GGG TTG TTC ACT GCT GGC C<br>CCC AAG GTC TCT GTT CCA AAT TCC TCT TTA CAG TAT<br>TTG G                                                                                                                                                                    |
| L1083F                                                                        | (HEK 293)                                                                                  | GTC ACC AAA TAC TGT AAA GAG GAA TTT GGA ACA GAG<br>ACC TTG GG                                                                                                                                                                                                                                                                                                                                                                               | CCC AAG GTC TCT GTT CCA AAT TCC TCT TTA CAG TAT<br>TTG GTG AC                                                                                                                                                                                                                                                                                                                                                                               |
| G1213V<br>D1222V<br>G1266R<br>N1270S<br>P1273L<br>S1362F-fs<br>S406A          | P-domain<br>P-domain<br>P-domain<br>P-domain<br>P-domain<br>TM 8<br>NTD                    | GCT GCA GAG CAT GGT TGT GGA CGT GGT TCT<br>CTG ATC ACG GGG GTC AAC CGG AAG ACA G<br>AAG TCG CCA TGG TGA GGG ATG GGG TCA ATG<br>GGG GGA TGG GGT CAG TGA CTC CCC GGC C<br>GTC AAT GAC TCC CTG GCC TTG GCC CAG G<br>CGG CCA TGG CAG CCT TCT GTG TCT GTG GTG C<br>GCA ACA GTT CTT TAT A AT CCC TCT GTA ATT AGC CCA<br>GAA GAA C                                                                                                                 | AGA ACC ACG TCC ACA ACC ATG CTC TGC AGC<br>CTG TCT TCC GGT TGA CCC CCG TGA TCA G<br>CAT TGA CCC CAT CCC TCA CCA TGG CGA CTT<br>GGC CGG GGA GTC ACT GAC CCC ATC CCC C<br>CCT GGG CCA AGG CCA GGG AGT CAT TGA C<br>GCA CCA CAG ACA CAG AAG GCT GCC ATG GCC G<br>GTT CTT CTG GGC TAA TTA CAG AGG GAT TAT AAA GAA<br>CTG TTG C                                                                                                                  |
| V456L                                                                         | NTD                                                                                        | CTA CAG ATG GTA CAC CTA CAT CTG TGC AGG AAG<br>TGG                                                                                                                                                                                                                                                                                                                                                                                          | CCA CTT CCT GCA CAG ATG TAG GTG TAC CAT CTG<br>TAG                                                                                                                                                                                                                                                                                                                                                                                          |
| K832R                                                                         | A-domain                                                                                   | GCG GGG CGA TAT CGT CAG GGT GGT CCC                                                                                                                                                                                                                                                                                                                                                                                                         | GGG ACC ACC CTG ACG ATA TCG CCC CGC                                                                                                                                                                                                                                                                                                                                                                                                         |

A-domain, actuator domain; NTD, N-terminal Cu-binding domain; N-domain, nucleotide-binding domain; P-domain, phosphorylation domain; TMD, transmembrane domain.

**Supplementary Table 2.** Copper Transport Rates of wt-, Mutant, and Variant ATP7B

|                                           | Protein domain | Cu-uptake rates, nmol/mg protein/min (SD) |
|-------------------------------------------|----------------|-------------------------------------------|
| wt-ATP7B                                  | —              | 0.038 (0.022)                             |
| Artificial mutant of phosphorylation site |                |                                           |
| <b>D1027A</b>                             | P-domain       | 0.005 (0.002)                             |
| Human mutants                             |                |                                           |
| <b>G85V</b>                               | NTD            | 0.008 (0.002)                             |
| <b>L492S</b>                              | NTD            | 0.006 (0.002)                             |
| <b>R616W</b>                              | NTD            | 0.004 (0.004)                             |
| <b>G626A</b>                              | NTD            | 0.002 (0.002)                             |
| <i>M645R</i>                              | NTD            | 0.034 (0.002)                             |
| <b>G710S</b>                              | Loop 2–3       | 0.000 (0.000)                             |
| <b>P760L</b>                              | TMD 4          | 0.000 (0.000)                             |
| <i>D765N</i>                              | TMD 4          | 0.008 (0.002)                             |
| <i>M769V</i>                              | TMD 4          | 0.012 (0.006)                             |
| <b>P840L</b>                              | A-domain       | 0.008 (0.002)                             |
| <i>I857T</i>                              | A-domain       | 0.024 (0.002)                             |
| <i>A874V</i>                              | A-domain       | 0.010 (0.004)                             |
| <b>R969Q</b>                              | Loop 5–6       | 0.006 (0.004)                             |
| <i>P992L</i>                              | P-domain       | 0.002 (0.002)                             |
| <b>T1031S</b>                             | P-domain       | 0.014 (0.004)                             |
| <b>P1052L</b>                             | P-domain       | 0.002 (0.002)                             |
| <b>E1064K</b>                             | N-domain       | 0.000 (0.000)                             |
| <b>H1069Q</b>                             | N-domain       | 0.017 (0.002)                             |
| <i>L1083F</i>                             | N-domain       | 0.010 (0.008)                             |
| <i>G1213V</i>                             | P-domain       | 0.004 (0.004)                             |
| <b>D1222V</b>                             | P-domain       | 0.006 (0.004)                             |
| <b>G1266R</b>                             | P-domain       | 0.002 (0.000)                             |
| <b>N1270S</b>                             | P-domain       | 0.010 (0.002)                             |
| <b>P1273L</b>                             | P-domain       | 0.006 (0.006)                             |
| <b>S1362F-fs</b>                          | TMD 8          | 0.004 (0.002)                             |
| Human variants                            |                |                                           |
| S406A                                     | NTD            | 0.020 (0.002)                             |
| V456L                                     | NTD            | 0.008 (0.002)                             |
| K832R                                     | A-domain       | 0.020 (0.002)                             |

NOTE. Mutations in bold are likely to be most severe (markedly affect copper transport) and mutations in italics type are mutations that are likely to be less severe or potentially correctable.

A-domain, actuator domain; NTD, N-terminal Cu-binding unit domain; N-domain, nucleotide (ATP) binding domain; P-domain, phosphorylation domain; TMD, transmembrane domain (see Figure 1B).
